# Supplementary material
Source: publisher figshare collection journal article supplement (https://geolsoc.figshare.com/ndownloader/files/5427131)
Supplement: Supplementary file 1 [file 5427131]

Table. Major element and strontium isotope data for unpublished data (Huh, unpublished).
SampleID	River Name	Date	Na	K	Mg	Ca	Cl	SO4	HCO3	Si	TDS	Sr	87Sr/86Sr
			mM	mM	mM	mM	mM	mM	mEq	mM	mg/l	?M
Chang Jiang (Ellis et al. in prep.)
CJ117	Yalong Jiang nr Chingshui He	1999-06-02	344	32	582	1260	204	213	3241	103	302	3	0.71174
CJ121	Yalong Jiang RB trib @ Hsia-Cha-ssu	1999-06-03	73	13	315	813	23	80	1992	90	176	1.18	0.71178
CJ122	Shin Ssu	1999-06-03	88	16	272	599	19	56	1556	105	139	0.92	0.71398
CJ123	Yalong Jiang @Manigango	1999-06-03	92	18	192	501	11	62	1263	91	115	0.95	0.71433
CJ125	Yalong Jiang trib Glacial stream	1999-06-05	58	9	469	918	7	237	2184	74	208	-	0.71401
CJ124	Yalong Jiang @ Gandze	1999-06-04	81	12	452	857	13	202	2161	83	202	1.73	0.71364
CJ126	Ni Chu ab. Da Wu	1999-06-05	134	23	529	820	19	80	2597	118	221	2.22	0.71191
CJ127	Ya Jiang	1999-06-05	268	45	545	876	13	85	2752	144	239	-	0.71455
CJ211	Ya Jiang	2000-06-02	154	21	405	631	25	79	1866	100	166	1.46	0.71285
CJ210	Tributary of Ya Jiang	2000-06-02	102	10	158	256	5	19	827	127	76	0.49	0.71625
CJ212	Litang River	2000-06-03	182	21	197	571	9	72	1361	115	128	0.8	0.71496
CJ206	Yalong Jiang	2000-05-29	149	28	311	595	22	85	1696	102	153	1.25	0.71293
CJ205	Anning River	2000-05-29	97	18	106	362	34	36	874	133	85	1.1	0.71404
BF101	Yalong Jiang	1998-08-00	246	36	395	763	51	102	2422	95	210	1.5	0.71302
TR124	Yalong Jiang below Er Tan dam	2004-08-15	123	26	280	586	29	90	1770	120	157	1.13	0.71201
TR125	Anning @ confluence with Yalong Jiang	2004-08-15	166	27	210	517	77	90	1426	181	138	1.31	0.71254
CJ105	Min Jiang ab. Song Pen	1999-05-28	138	21	409	941	25	58	2826	84	233	3.71	0.70978
BF103	Min Jiang bl. Guang Xian	1998-08-00	96	29	289	808	29	121	1912	80	175	1.53	0.71287
CJ128	Dadu He nr Lu Ding	1999-06-06	102	29	241	567	15	76	1489	104	136	1.5	0.71174
CJ209	Dadu He	2000-06-01	98	23	227	540	16	85	1379	89	127	1.42	-
CJ207	Shimian River	2000-05-29	69	16	74	254	14	46	579	131	62	0.46	0.71543
BF102	Dadu He bl. Shimian	1998-08-00	136	29	280	719	33	92	1891	81	168	1.5	0.71163
CJ204	Dadu He	2000-05-28	107	26	269	591	21	110	1504	95	141	1.53	0.71179
CJ203	Niri River	2000-05-28	54	17	241	509	18	84	1280	89	119	0.8	0.71136
CJ202	Tributary of Dadu He	2000-05-28	40	12	177	500	13	98	1103	81	107	1.19	0.7114
CJ201	Dadu He nr Lu Ding	2000-05-27	102	26	257	578	21	113	1456	93	137	1.38	0.71193
CJ208	Ching Jiang @ Tien Chuan	2000-06-01	60	14	267	642	18	231	1351	81	143	1.23	0.71301
ML107	Ching Jiang	1991-09-25	506	68	439	822	288	541	1769	71	230	7	0.71018
CJ139	Bailong Jiang LB trib @ Liang He Kou	1999-06-14	190	30	504	1060	78	167	2810	87	253	8.47	0.70934
CJ140	Bailong Jiang LB trib @ Liang He Kou	1999-06-14	298	98	455	931	152	184	2432	84	233	5.33	0.70999
CJ137	Bailong Jiang	1999-06-13	283	36	642	1100	110	437	2825	101	289	6.15	0.71048
CJ136	Wun Jiang	1999-06-12	195	24	463	991	45	306	2526	96	245	5.53	0.71001
CJ135	Bailong Jiang @ Yao Tu	1999-06-12	259	37	540	1040	82	546	2548	97	276	-	0.71045
CJ104	Fu Jiang @ Huang Rong	1999-05-28	72	9	343	1010	19	86	2798	66	232	2.56	0.71042
CJ103	Fu Jiang ab. Ping Wu	1999-05-28	73	16	446	1070	19	250	2526	77	237	3.34	0.71062
Internal Drainage
TS101	No name 1		73	28	23	211	11	20	525	39	48	0.18
TS102	No name 2	1991-08-12	57	47	92	751	8	146	1534	38	144	0.6
TS103	No name 3	1991-08-12	67	19	49	301	8	60	627	35	61	0.05	0.713958
TS104	No name 4	1991-08-12	69	40	46	397	10	67	827	31	78	0.15
TS105	No name 5	1991-08-12	43	15	44	247	12	31	526	38	50	0.24
TS106	No name 6	1991-08-13	45	22	50	276	13	40	592	43	57	0.39
TS107	No name 7	1991-08-13	34	26	41	251	9	46	527	44	52	0.34
TS108	No name 8	1991-08-13	90	26	49	377	6	88	756	49	76	0.35
TS109	No name 9	1991-08-13	62	15	32	259	11	79	457	50	52	0.28	0.720076
TS110	No name 10	1991-08-13	98	23	49	355	16	28	810	94	76	0.47
TS111	No name 11	1991-08-13	74	29	71	564	14	93	1163	41	109	0.55	0.713309
TS112	No name 12	1991-08-13	60	33	66	425	17	97	875	48	87	0.41	0.701442
TS113	No name 13	1991-08-23	39	15	29	251	14	32	531	8	48	0.28
TS114	No name 14	1991-08-23	38	10	38	405	17	73	742	35	73	0.35
TS115	No name 15	1991-08-23	20	14	25	185	6	11	453	14	38	0.23
TS116	No name 16		83	27	53	577	14	135	1054	69	108	0.45	0.715717
ML103	Gez ab Oytag River	1992-06-05	689	124	730	761	290	627	2391	199	295	4.53	0.711894
ML104	Oytag	1992-06-11	369	55	602	1430	258	1140	1821	78	315	6.96	0.711108
ML105	Xingguan Stream	1992-06-14	138	27	286	837	134	260	1735	51	182	6.38	0.710191
ML106	Ili	1992-07-28	2390	60	730	957	864	1090	2517	105	406		0.710004
ML107	Chingyi Jiang	1991-09-28	506	68	439	822	288	541	1769	71	231	5	0.710183
ML108	Zavhan	1991-	87	13	58	184	32	30	516	94	52	0.28	0.70974
ML109	Malasi	1991-	276	40	245	853	131	274	1915	111	201	2.38	0.709413
ML110	Kachi	1991-	363	52	301	953	315	251	2078	49	219	2.96	0.710085
ML112	Assy	1993-06-18	306	29	272	920	164	93	2467	147	223	2.49	0.709489
ML113	Talas	1993-06-24	727	51	818	603	288	632	2183	46	267	5.77	0.711499
ML114	Sary Dzhas	1993-07-13	181	40	351	892	134	278	1929	66	201	3.08	0.711158
ML116	Chu @ Krasniy Most	1993-07-17	572	43	447	868	399	426	2005	30	238	4.24	0.711093
ML117	Karabalty	1993-07-20	108	17	108	771	92	148	1580	61	153	3.77	0.709795
ML118	Bitut Am	1993-08-13	312	123	182	1220	53	164	2933	213	272	1.98	0.710743
ML119	Tatsiyn Gol	1993-08-27	384	43	237	700	107	127	1907	176	185	1.63	0.710895
ML120	Korla	1993-09-12	6110	216	2120	1550	4120	2700	4278	116	932	7.19	0.710612
ML121	River into Turfan Depression from N	1993-09-12	968	20	383	1620	505	836	2995	157	385	4.16	0.708271
ML304	E Stream into lake Tsochen	1995-09-25	399	32	141	598	98	135	1491	158	153	1.29
ML305	N Stream into lake Tsochen	1995-09-26	341	30	339	1230	106	462	2604	139	279	1.8	0.712111
Indus
PA2	Thale	1994-12-09	110	51	341	985	16	381	1973	99	214	4.05	0.710582
PA3	Tengus E	1994-12-10	79	118	234	1180	6	842	1412	100	231	1.59	0.707224
PA4	Tengus W	1994-12-10	84	161	239	1050	13	699	1553	66	221	1.4	0.705664
PA5	Baghicha E	1994-12-10	134	174	326	1550	81	1240	1675	92	308	2.23	0.705056
PA6	Baghicha W	1994-12-10	163	171	532	1340	41	992	2096	98	305	2.73	0.704508
PA7	Stak	1994-12-11	547	119	262	1370	52	1190	1552	229	302	1.74	0.732779
PA8	Shengus	1994-12-11	476	249	625	3290	11	3490	1399	254	603	4.35	0.779451
PA9	Shabatut	1994-12-11	266	111	184	1070	10	716	1434	155	222	1.23	0.844794
PA10	1st W of Chilas	1994-12-12	525	64	350	1070	99	142	2976	359	283	1.57	0.707457
PA11	Thor	1994-12-12	174	34	169	456	10	107	1224	194	123	0.6	0.708328
PA12	Sumer	1994-12-12	69	16	49	201	11	35	494	127	53	0.27	0.707722
PA13	Sazin	1994-12-12	137	30	164	846	43	76	1830	200	173	1.04	0.708038
PA14	Harbin	1994-12-12	128	18	115	364	28	56	973	202	98	0.44
PA15	Tishe	1994-12-12	60	17	52	202	16	28	531	128	54	0.27	0.70767
PA16	Twixt Tishe & Lutr	1994-12-12	65	34	54	269	12	117	477	108	62	0.32	0.708001
PA17	Lutr	1994-12-12	51	15	98	241	13	73	557	124	62	0.29	0.708509
PA18	Shatial	1994-12-12	192	40	255	811	22	215	1910	187	192	1.11	0.70761
PA19	Tirikol W	1994-12-9~12	118	111	148	558	31	144	1397	127	139	1.03	0.706302
PA20	Khardughas	1994-12-9~12	88	189	110	960	14	451	1437	122	188	1.22	0.705041
PA21	Ghachitang Ghurse	1995-05-09	156	93	159	1280	93	112	2938	143	261	0.77	0.709271
PA22	Shyok, Surmo Bridge	1995-05-09	599	90	338	762	259	297	2046	94	222	2.2
PA23	Yuchung Spring	1995-05-09	424	175	177	1330	76	1020	1402	213	272	3.88
PA24	Gilgit	1995-05-21	138	60	221	673	36	206	1440	89	151	1.21
PA25	Ishkomen	1995-06-early	145	98	457	550	36	280	1640	9	167	1.56	0.714687
PA26	Yasin	1995-06-early	147	54	371	513	57	264	1299	0	140	1.99
PA27	Gizar, Fander-Tera	1995-06-early	56	22	30	258	30	36	528	77	54	0.31	0.705804
PA28	Chitral @ Ragh Valley	1995-06-early	184	57	600	954	59	548	2277	109	257	3.35
PA29	S Chitral @ Aown Valley	1995-06-early	126	65	230	896	23	22	2262	86	191	0.89	0.717636
PA30	Chitral @ Karimabad valley, Garm Shashma	1995-06-early	151	19	316	894	28	220	2080	97	200	1.03	0.719697
PA31	Shandur @ Harelin	1995-06-early	148	61	149	633	47	268	1145	84	136	1.01	0.708397
PA32	Garm Chashma	1995-06-early	104	72	178	647	28	274	1176	132	141	1.18	0.716504
PA33	1st stream E of Astor	1995-07-29	47	41	53	316	6	144	540	72	67	0.43	0.718141
PA34	2m below Chilum	1995-07-29	47	9	16	111	8	11	290	77	30	0.14
PA35	Upper Sadpara	1995-07-30	57	19	60	429	10	80	907	78	88	0.51	0.710125
PA36	Lower Sadpara	1995-07-30	44	5	25	263	2	89	443	70	52	0.32
PA37	Kala Pani, Deosai	1995-07-29	42	6	9	74	4	1	213	79	22	0.14	0.707091
PA38	E main river @ Deosai cottage	1995-07-29	43	5	17	153	2	16	362	65	35	0.1
PA39	Halde	1995-08-12	66	100	80	802	14	568	855	42	148	7.52	0.709732
PA40	Hushe @ Halde	1995-08-12	86	109	96	768	4	158	1676	54	158	1.03	0.713298
PA41	Talis	1995-08-05	69	60	158	667	6	246	1337	52	142	1.41	0.713721
PA42	Muchlu	1995-08-05	214	72	794	1150	53	686	2734	112	312	4.26	0.706446
PA43	Kondus @ Halde	1995-08-12	103	69	95	646	5	95	1484	69	136	1.24	0.710283
PA44	Shyok @ Surmo Bridge	1995-08-12	256	89	182	776	114	160	1920	84	185	1.39
PA45	Surmo Spring	1995-08-12	214	113	182	1140	19	903	1253	170	232	3.07	0.705926
PA46	Yuchung Spring	1995-08-12	286	127	133	1088	12	810	1196	218	221	2.85
PA47	Ghangche	1995-08-12	50	33	24	202	4	63	425	42	45	0.32	0.706662
PA48	Bara	1995-08-13	54	35	41	259	3	92	531	49	58	0.43
PA49	Ghowari	1995-08-15	259	114	203	1000	23	446	1992	129	226	1.21	0.708009
PA50	Gon nr Kiris	1995-08-15	268	292		299	58	280	788	184	117	1.93	0.706705
PA51	Tsongha spring	1995-08-15	547	108	375	888	61	473	2024	126	238	2.96	0.710477
PA52	Karku	1995-08-15	195	67	491	915	10	478	2081	82	232	2.31	0.711408
PA53	Yughu	1995-08-15	88	58	64	369	17	104	812	53	83	0.28	0.708529
PA54	Karfaq	1995-08-15	38	46	41	263	4	29	626	51	58	0.3	0.708663
PA55	Thale	1995-08-15	65	35	185	925	5	246	1886	54	185	2.97	0.710395
PA56	Kiris	1995-08-15	82	41	72	404	16	109	875	105	91	0.53
PA57	Gol	1995-08-15	200	48	116	551	31	92	1439	147	137	0.87	0.707978
PA58	Pisar, Nar W	1995-08-15	98	122	111	1020	6	112	2366	77	208	0.67	0.709175
PA59	Indus @ Humayun Br	1995-08-15	129	31	165	866	18	211	1870	55	179	2.44	0.709722
PA60	Luma @ Nar E	1995-08-15	58	46	63	516	7	89	1132	64	106	0.3	0.709005
PA61	Hashupa	1995-08-16	125	169	346	777	4	434	1772	64	201	3.1	0.709687
PA62	Skoramlok @ Churka	1995-08-16	111	108	623	879	4	751	1766	34	237	2.48	0.712376
PA63	Shigar @ Bazaar	1995-08-16	73	51	275	814	4	332	1670	39	178	1.83	0.710855
PA64	Hasanabad	1995-08-16	75	49	71	405	7	57	997	82	92	0.51
PA65	Gamba Skardu, splashway	1995-08-16	27	29	31	524	1	108	999	39	96	0.51	0.709064
PA66	Chunda	1995-08-16	30	36	72	687	3	213	1215	37	127	0.89	0.711164
PA67	Alchori	1995-08-16	71	112	243	713	3	489	1138	28	158	1.39	0.713649
PA69	Kachura	1995-08-16	50	28	19	242	3	68	474	44	50	0.15	0.709369
PA70	Airport spring	1995-08-16	166	54	182	943	20	239	2044	128	202	1.53	0.709902
PA71	Baghardo	1995-08-16	277	78	75	605	4	188	1226	86	132	0.65	0.707295
PA72	Tseri	1995-08-16	82	134	134	776	6	255	1646	94	171	0.96	0.706824
PA142	Shatial	1996-02-15	223	39	274	830	51	196	1916	214	195	1.02
PA143	Besham	1996-02-17	152	65	259	784	69	176	1701	155	174	0.9	0.718621
PA144	Thakot	1996-02-17	190	37	117	490	77	57	1142	223	118	0.62
PA145	Thale	1996-04-28	123	50	378	1050	31	489	2046	90	232	3.3
PA146	Indus, Humayun br.	1996-04-28	123	28	284	1180	56	290	2502	109	245	3.89
PA147	Sadpara R @ Skardu br.	1996-04-28	121	61	250	842	70	123	2070	129	191	1.08
PA148	Baghicha W	1996-04-28	123	156	386	1160	31	798	1704	75	249	1.96	0.704587
PA149	Stak	1996-04-28	337	116	179	1040	44	800	1230	177	221	1.17
PA150	Jaglot	1996-04-28	80	61	96	508	29	198	893	103	107	0.47
PA151	Kus Komila	1996-04-29	122	30	174	433	31	95	1106	336	122	0.47
PA152	S of Kus Komila	1996-04-29	42	19	58	225	16	18	593	118	57	0.3	0.70847
PA153	Double Nala, N of Jijal	1996-04-29	55	22	793	358	33	25	2356	306	199	0.24	0.709991
PA154	Jijal	1996-04-29	50	54	1040	607	82	93	3093	432	276	0.56	0.711127
PA155	Besham	1996-04-29	63	43	145	534	40	78	1145	132	114	0.6
PA156	Janian	1996-04-29	174	81	170	779	46	191	1621	231	174	0.88
PA117	Bar, Chalt	1995-08-17	41	68	259	829				50	46
PA118	Hunza @ Chalt bridge	1995-08-17	69	194	361	1000				92	64		0.712287
PA119	Jaglot Ga	1995-08-17	51	129	149	1180				82	62		0.705854
PA120	Rahimabad	1995-08-17	60	112	73	1020	23	966	403	75	171
PA121	Danyor	1995-08-17	33	98	82	1050	4	399	1593	55	186		0.704903
PA122	Oshkandas	1995-08-17	32	85	206	903	3	380	1572	47	179
PA123	Jaglot Sehi	1995-08-17	63	55	74	378	12	152	707	98	84
PA124	Thak Niat	1995-08-17	84	66	138	710	16	254	1322	84	146
PA125	Dubair	1995-08-18	23	8	43	130	4	16	341	55	33
PA126	Besham	1995-08-18	75	42	189	567	24	112	1381	123	133
PA127	Keyal	1995-08-18	23	8	18	80	2	14	196	47	21
PA128	Indus, Besham Kun br	1995-08-18	103	116	207	975	47	217	2102	100	206
PA129	Patan	1995-08-18	143	29	291	724	42	329	1502	270	180
PA130	Lahari	1995-08-18	242	118	266	1100	47	592	1861	290	248
PA132	Dasu	1995-08-18	38	13	32	126			367	86	34
ML101	Hunza bl Gilgit River	1992-06-02	338	164	530	1290	93	987	2153	123	313	3.5	0.707846
ML102	Hunza N of Shishkat bridge	1992-06-04	138	112	419	795	157	305	2035	83	212	1.68	0.7131
ML306	Shiquanhe	1995-09-29	722	48	196	751	200	123	2137	194	212	1.65	0.709959
ML308	Indus	1995-10-01	565	41	351	786	405	184	1842	138	205	2.35	0.709781
ML309	Sutlej	1995-10-02	366	55	518	1010	54	522	2457	116	270	4.74	0.712847
Brahmaputra
A1	-	1990-09-29	322	28	270	747	97	237	1865	116	190	1.85	0.711847
A2	-	1990-09-29	468	34	96	414	185	200	978	152	125	1.18	0.711984
A3	Ya-lu Tsang-Pu	9-30-90	367	31	261	974	128	320	2136	88	224	2.26	0.711969
A4	Je-ko Tsang-Pu	10-01-90	388	23	149	630	66	321	1270	92	154	2.13	0.708723
A5	Je-ko Tsang-Pu	10-01-90	405	25	123	738	51	404	1279	114	167	2.2	0.708428
A6	LB trib of Ma Chuan Ho	10-02-90	220	32	204	1080	55	211	2309	120	223	2.11	0.713203
A7	LB trib of Ma Chuan Ho	10-03-90	535	36	162	639	80	122	1879	174	181	1.45	0.713698
A8	Ma Chuan Ho	10-03-90	616	35	128	610	182	481	983	102	161	2.18	0.709536
A9	-	10-06-90	183	14	347	726	7	363	1611	67	178	2.2	0.713014
A10	Chai Ho	10-08-90	559	45	263	1090	389	138	2710	110	261	2.38	0.715052
ML301	Namling	1995-09-19	244	27	126	586	52	219	1143	121	132	1.56
ML302	Tsangpo nr Latse	1995-09-21	314	26	280	965	116	353	2005	62	216	2.08
ML311	Trib of Tsangpo hw.	1995-10-05	857	43	118	628	273	494	1052	120	177	2.11
ML312	Trib of Tsangpo hw.	1995-10-06	583	35	204	867	201	402	1731	118	211	2.17
